# Supplementary material
Source: publisher figshare collection journal article supplement (https://acs.figshare.com/ndownloader/files/14189771)

## Supporting Information

### **Identification of [6-Hydroxy-2-(hydroxymethyl)-5-oxo-5,6-dihydro-2*H*-pyran-3-yl]-cysteine (HHPc) as a Cysteine-specific Modification Formed from 3,4-Dideoxyglucosone-3-ene (3,4-DGE)**

Sabrina Gensberger-Reigl<sup>†</sup>, Lisa Atzenbeck<sup>†</sup>, Alexander Göttler, Monika Pischetsrieder\*

Friedrich-Alexander University Erlangen-Nürnberg (FAU), Department of Chemistry and Pharmacy, Food Chemistry, Nikolaus-Fiebiger-Str. 10, 91058 Erlangen, Germany

<sup>†</sup> These authors contributed equally to the work.

\* Correspondence to MP, phone: +49-9131-8565592; E-mail: monika.pischetsrieder@fau.de

## Table of Contents

### Figure S-1, pp S2–S4

Enhanced product ion spectra of the modified nonapeptide Ac-GWGCGRGKG-NH<sub>2</sub> after incubation with 3,4-dideoxyglucosone-3-ene, which resulted in a mass shift of (A) +162 Da, (B) +144 Da, (C) +142 Da, and (D) +126 Da. All detected peptide fragments are marked in the peptide sequence and modified peptide fragments are highlighted with an asterisk. Binding sites of modification products were determined according to the detected modified and unmodified peptide fragments of b- and y-series.

### Scheme S-1, p. S5

The glycating agent 3,4-dideoxyglucosone-3-ene (3,4-DGE) and its hydration products 3-deoxyglucosone (3-DG) and 3-deoxygalactosone (3-DGal).

Figure S-1

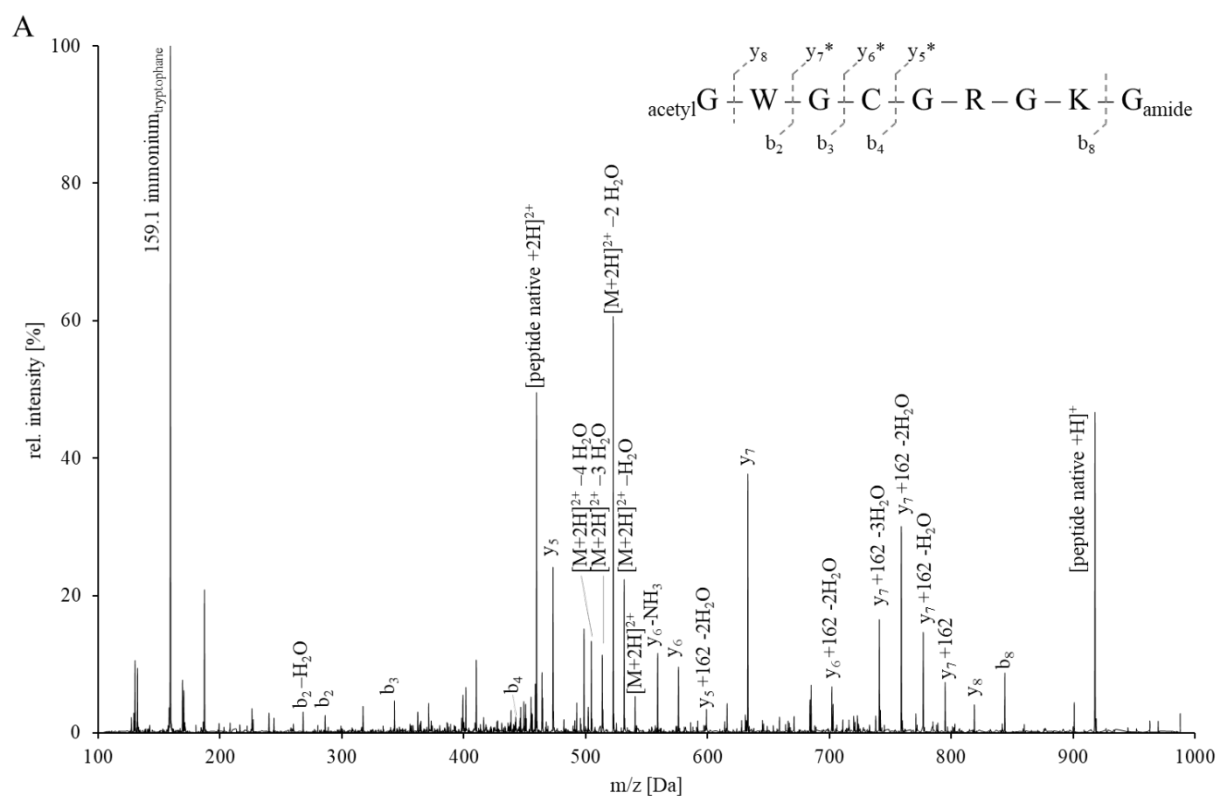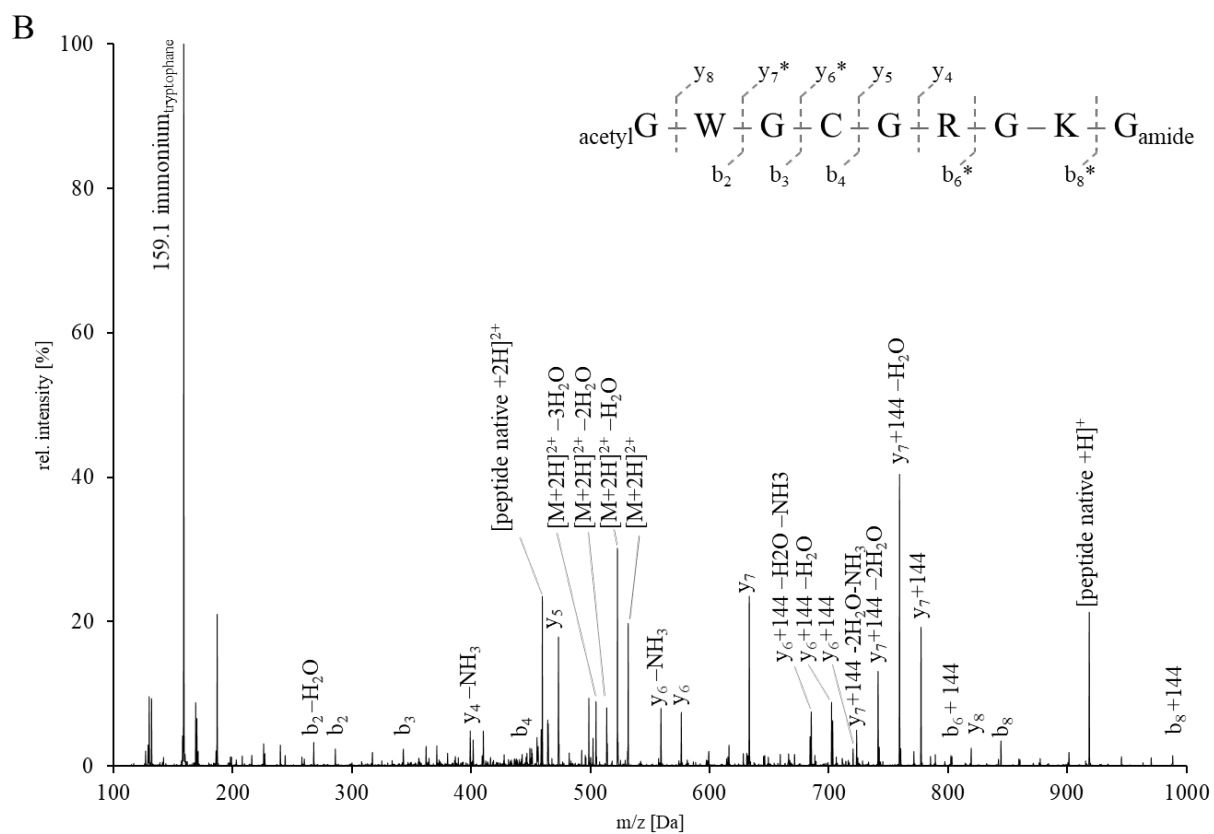

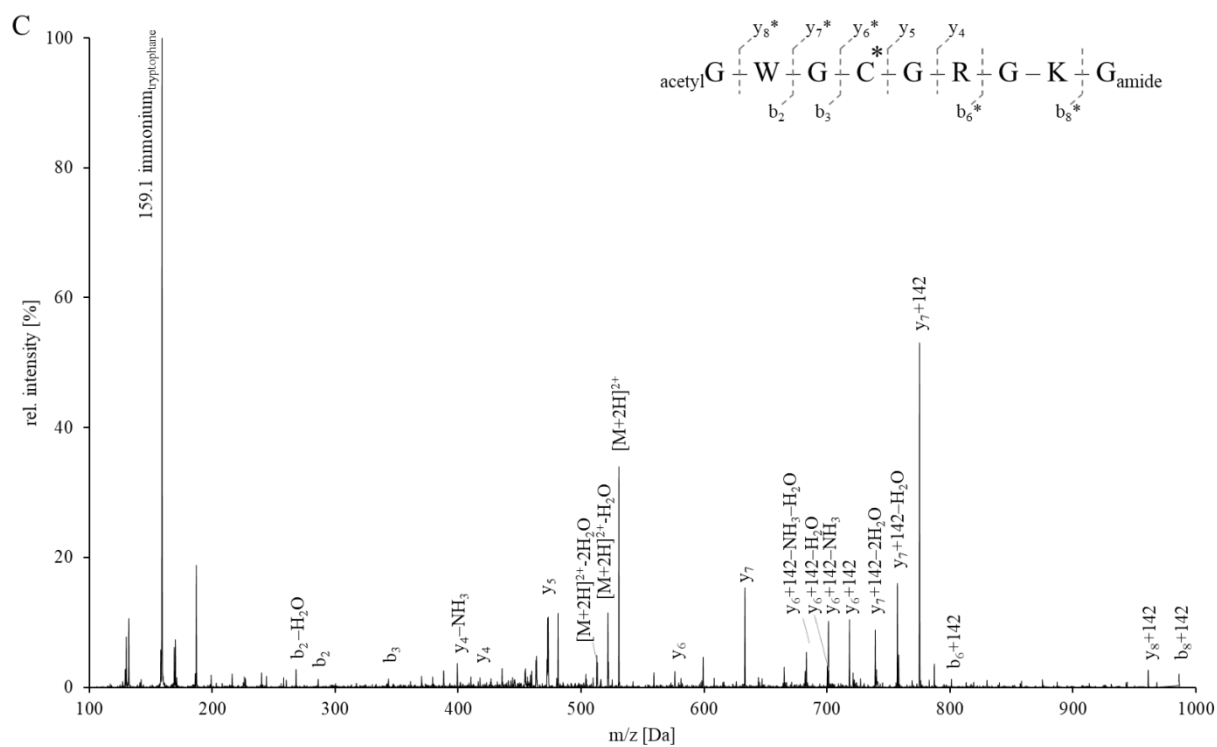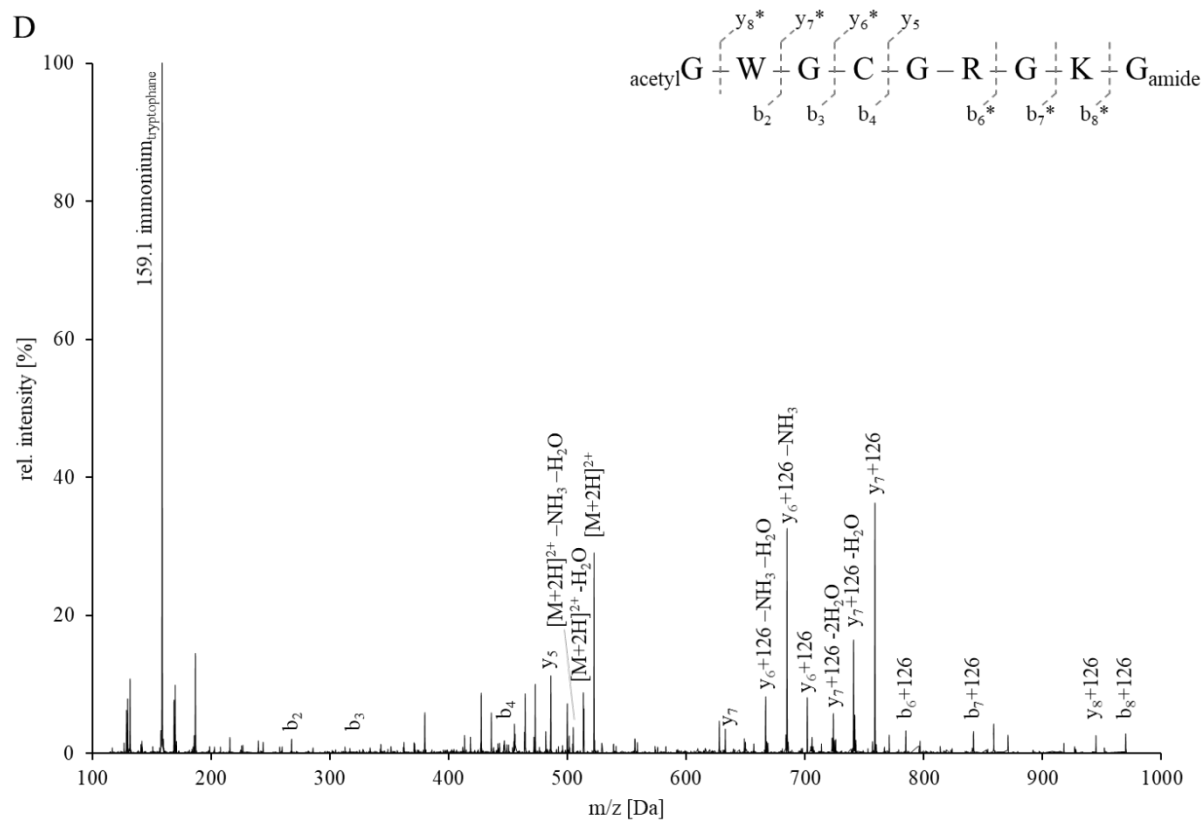

Scheme S-1

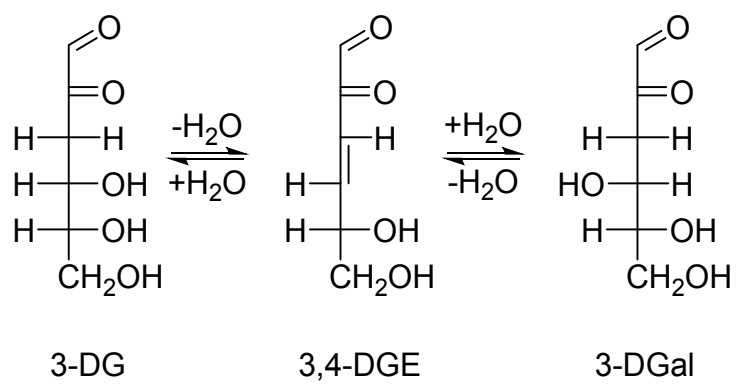

Supplement: Supplementary file 1 [file 14189771]
